1  
2  
3  
4  
5  
6  
7  
8  
9  
10  
11  
12  
13  
14  
15  
16  
17  
18  
19  
20  
21  
22  
23  
24  
25

Rapid clearing of biological organs by using phosphoric acid, a hydrophilic solution with high refractive index

(Short title) Rapid clearing of biological organs by using phosphoric acid

Masakazu Umezawa<sup>1,2¶\*</sup>, Shinsuke Haruguchi<sup>1¶</sup>, Rihito Fukushima<sup>1</sup>, Shota Sekiyama<sup>1</sup>, Masao Kamimura<sup>1,2</sup>, Kohei Soga<sup>1,2\*</sup>

<sup>1</sup> Department of Materials Science and Technology, Faculty of Industrial Science and Technology, Tokyo University of Science, Katsushika-ku, Tokyo, Japan

<sup>2</sup> Imaging Frontier Center, Research Institute for Science and Technology, Tokyo University of Science, Noda-shi, Chiba, Japan

\* Corresponding authors

E-mail: masa-ume@rs.noda.tus.ac.jp (MU), mail@ksoga.com (KS)

¶ These authors contributed equally to this work.

## 26 **Highlights**

- 27 ■ Phosphoric acid can reduce light scattering by tissue samples.
- 28 ■ Tissue clearing effect of phosphoric acid is fast and needs only 60-min incubation.
- 29 ■ Cell membrane was preserved during incubation using phosphoric acid.

30

31

## 32 **Abstract**

33 Tissue clearing is a fundamental challenge in biology and medicine to achieve high-resolution  
34 optical imaging of tissues deep inside intact organs. The clearing methods, reported up to now,  
35 require long incubation time or physical/electrical pressure to achieve tissue clearing, which is  
36 done by matching the refractive indices of the whole sample and medium to that of the lipid  
37 layer. Here we show that phosphoric acid increases the refractive index of the medium and can  
38 increase the transparency of formalin-fixed tissue samples rapidly. Immersion of fixed tissues  
39 of mice in phosphoric acid solutions increased their transparency within 60 min in the case of  
40 3-mm-thick fixed tissue specimens. While phosphoric acid suppresses bright signals on the  
41 boundary of cells in their phase-contrast images, it does not damage the morphology of cell  
42 membrane with phospholipid bilayer. The protocol presented herein may contribute to develop  
43 better and faster soaking methods for tissue clearing than previously reported protocols.

44

## 45 **Introduction**

46 Whole-tissue and whole-body imaging of single cells in opaque organisms like mammals has  
47 been fundamental challenges in biology and medicine. Biological three-dimensional imaging  
48 has been achieved by reconstructing three-dimensional structure from images taken from  
49 mechanically serially sectioned tissues, for example serial block-face scanning electron  
50 microscopy [1] and array tomography [2]. However, the technique is not only labor-intensive

51 and time-consuming but also error-prone [3]. The utility of rendering tissue optically  
52 transparent has been well known for three-dimensional imaging of cell populations located deep  
53 inside intact tissue. Optical sectioning provides a potentially fast, simple and inexpensive  
54 alternative for three-dimensional reconstruction; however, its utility for deep imaging is  
55 prevented by tissue opacity.

56

57 Optical imaging of thick tissues is mostly limited by scattering of imaging light through thick  
58 tissues, which contain various cellular and extracellular structures with different refractive  
59 indices. The imaging light traveling through different structures scatters and loses its excitation  
60 and emission efficiency, resulting in a lower resolution and imaging depth [4]. The low  
61 refractive index of water compared with that of cellular structures containing proteins and lipids  
62 has been the major issue in this regard; in order to address this problem, the main concept of  
63 tissue clearing is to adjust the difference between the refractive index of the medium and that  
64 of the lipid bilayer [5, 6]. The clearing was achieved by hydrophobic solutions during the early  
65 stage of technical development [7]. In this method, a fixed sample is incubated in a mixture of  
66 benzyl-alcohol and benzyl benzoate after dehydration of samples with ethanol and hexane.  
67 Subsequent reports have shown that the use of tetrahydrofuran (THF) or dibenzyl ether (DBE)  
68 instead of alcohol for dehydration improved the clearing of entire brains of adult mice [8, 9]  
69 and this method is applicable to clearing lipid-rich spinal cord [10]. Removing membrane lipids  
70 by repetitive organic solvent-based dehydration-rehydration improved the permeabilization of  
71 tissues [11].

72

73 To reduce the denaturation and to improve the retention of fluorescent signals in formalin-fixed  
74 tissue samples, urea-based hydrophilic mixtures, *Scale*, have been developed [12]. Because this  
75 technique provided a simple, inexpensive alternative to array tomography and serial section

76 electron microscopy, it contributed to promoting and devising further protocols for tissue  
77 clearing. Formamide or formamide/poly(ethylene glycol), Clear<sup>T</sup> and Clear<sup>T2</sup>, were able to clear  
78 mouse embryo and brain with no detergents or solvents [13]. SeeDB containing optical clearing  
79 agents, fructose and  $\alpha$ -thioglycerol, renders tissue samples transparent to allow analyses of  
80 cellular morphology without removing any components of tissues during the clearing process  
81 and thus with minimum deformation artifacts [14]. Adding fructose to urea can control urea-  
82 mediated tissue expansion during the clearing process [15]. Sugar and sugar-alcohol solutions  
83 also achieve clearing of 100- $\mu$ m-thick mouse brain slices [16]. Preparation of clearing solutions  
84 to adjust the refractive index of samples to that of immersion oil (1.518) on the objective lens  
85 is effective for high-resolution fluorescence imaging [17]. Electrophoresis to remove lipids  
86 after embedding tissue into hydrogel polymer contributes to better tissue-clearing in a method  
87 named CLARITY [18]. However, because this method was technically complex, a passive  
88 tissue clearing approach using different fixative-hydrogel monomer crosslinking solutions was  
89 subsequently reported for adult rodents or human postmortem brain [19, 20]. Solution of 2,2'-  
90 thiodiethanol is also effective for clearing brains [21] and facilitated three-dimensional  
91 observation of formalin-fixed and fluorescent-labeled whole mouse brains and 2-mm-thick  
92 block of human brains in combination with CLARITY [22]. To improve the methodology to  
93 deliver reagents deep inside thick tissues, rapid (4-20 h for clearing whole organs) technique of  
94 active clarity, ACT-PRESTO, was reported for rendering large tissue samples such as rat and  
95 rabbit brains, and even whole bodies of adult mice, optically transparent [23]. On the other hand,  
96 CUBIC method achieves tissue transparency by passively clearing phospholipids and is  
97 compatible with hydrogel embedding using a mixture of urea and aminoalcohol [24], which  
98 decolorizes blood by efficiently eluting the heme chromophore from hemoglobin [25].  
99 Optimized CUBIC protocols for whole-body transparent observation of mice [26] and organs  
100 of rats [27] are also reported. To reduce tissue damage and degradation, ScaleS method was

101 developed with a mild tissue-permeant sugar-alcohol, sorbitol, and allowed optical  
102 reconstructions of three-dimensional mapping of amyloid plaques, neurons and microglia by  
103 successive fluorescence and electron microscopy [28]. However, one of the major issues is that  
104 the protocols reported above for clearing tissues require long incubation time from several hours  
105 to days or pressure that also damages the samples. Rapid and simple soaking protocols for tissue  
106 clearing are thus desirable.

107

108 Many hydrophilic solvents for tissue clearing, *Scale*, FRUIT, and CUBIC, contain liquids of  
109 high refractive index to increase the refractive index of the incubation medium, in some cases,  
110 surfactant to delipidate [29] and potentially promote infiltration of the reagent deeper into  
111 tissues, and urea [12, 15, 24, 28, 30]. The refractive index of a material is proportional to the  
112 square root of the dielectric constant of that material. Therefore, we hypothesized that tissue  
113 clearing is achieved by not only increasing the refractive index of the medium but also by  
114 affecting polarization and dielectric coefficient of the lipid membrane, which is composed of  
115 non-polarized fatty-acid chain and polarized phosphate group, due to some molecules such as  
116 urea in the solutions. In particular, the research group who developed *Scale* containing urea,  
117 Triton X-100, and glycerin, showed that partial tissue clearing was achieved using only urea  
118 and the surfactant [12]. The mechanism underlying tissue clearing effect by urea is not known  
119 but may be important to explore. In the present study, we first investigated the potential  
120 contribution of urea to adjusting the refractive indices of the medium and lipid membrane. Next,  
121 the tissue clearing effect of phosphoric acid, an anionic molecule that does not interact with  
122 anionic lipid bilayer but increases the refractive index of medium, was investigated. We show  
123 that urea does not directly contribute to decreasing the refractive index of lipid bilayer, and  
124 phosphoric acid, which increases the refractive index of the medium, is able to clear the tissues.  
125 Although the incubation for fixed tissue sample in phosphoric acid is only passive immersion,

126 the incubation time required for clearing whole organ samples of mice is faster ( $\approx 1$  h) compared  
127 to the case of other clearing reagents. The rapid optical clearing protocol using phosphoric acid  
128 will contribute to further improvement of tissue clearing protocols and will aid in the  
129 advancement of biological research.

130

## 131 **Materials and Methods**

132

### 133 Measurement of refractive index of solutions

134 Solutions of saturated concentration of 1,2-dipalmitoyl-sn-glycero-3-phosphocholine (DPPC)  
135 and 4 M urea were prepared in ethanol. The refractive indices of the mixed solutions in ethanol,  
136 water, and aqueous solutions of phosphoric acid (4–14.2 M), urea (4 M), sodium iodide (2 and  
137 4 M), indium chloride (4 M), and ScaleA2 were measured by Abbe's refractometer (NAR-1T,  
138 Atago Co., Ltd., Tokyo, Japan).

139

### 140 Measurement of refractive index and optical loss of liposome suspension

141 Liposome suspension was prepared by the Bangham method [31]. Briefly, a mixture of 12  $\mu\text{mol}$   
142 of DPPC, 12  $\mu\text{mol}$  of 1,2-dioleoyl-sn-glycero-3-phosphocholine (DOPC), 12  $\mu\text{mol}$  of  
143 cholesterol, and 4  $\mu\text{mol}$  of *N*-(Carbonyl-methoxypolyethyleneglycol 2000)-1,2-distearoyl-sn-  
144 glycero-3-phosphoethanolamine (DSPE-PEG) was prepared in 1600  $\mu\text{L}$  of chloroform in an  
145 eggplant-shaped glass flask, and then evaporated at 37°C to remove chloroform and to obtain a  
146 thin lipid bilayer on the inner wall of the flask. 7.5-mL of either of distilled water, aqueous  
147 solution of urea (4 M) or phosphoric acid (14.2 M) was added into the flask and sonicated to  
148 prepare liposome suspension in each liquid. The light transparence (wavelength: 600 nm) of  
149 the liposome suspensions were measured by spectrometer V-660 (JASCO Co., Tokyo, Japan)  
150 and 1.5-mL disposable cuvette (Brand GmbH & Co. KG, Wertheim, Germany).

151

152 Measurement of optical loss of cell suspension of mouse brain

153 All animals were handled in accordance with the national guidelines for the care and use of  
154 laboratory animals and with the approval of the Animal Care and Use Committee of the Tokyo  
155 University of Science. Brain samples isolated from adult ICR mouse sacrificed under hyper-  
156 anesthesia were minced by using BioMasher (Nippi Inc., Tokyo, Japan), suspended in PBS, and  
157 fixed by 4 wt% formaldehyde in PBS overnight. Fixed cell suspension was collected by  
158 centrifugation ( $1200 \times g$ , 5 min) and washed with PBS three times, and divided into different  
159 tubes. The cell suspensions were then incubated in either of ScaleA2, PBS, or aqueous solution  
160 of urea (4 M), indium chloride (4 M), sodium iodide (2, 4 M), Triton X-100 (10 wt%),  
161 phosphoric acid (8.5, 11.4, 14.2 M), or 0.1 wt% Triton X-100 in phosphoric acid (14.2 M) for  
162 24 h at room temperature. The optical loss (OD600) was measured by spectrometer V-660  
163 (JASCO) and 1.5-mL disposable cuvette (Brand GmbH & Co. KG).

164

165 Observation of morphology and phase-contrast image of formalin-fixed cells

166 Cultured Colon-26 cells were maintained in Minimum Essential Medium [(+)Eagle's salt, (+)L-  
167 glutamine] (Gibco, Thermo Scientific, MA, USA) supplemented with 10% fetal bovine serum  
168 (Biowest, Nuaille, France) and 1% penicillin-streptomycin (Wako, Tokyo, Japan) at 37°C in  
169 humidified air containing 5% CO<sub>2</sub>. After staining of the cell membrane by CellMask Orange  
170 (Thermo Fisher Scientific), the cells were fixed by 4 wt% formaldehyde in PBS for 10 min,  
171 washed with PBS, and then incubated in phosphoric acid (14.2 M) for 0-48 h. Cell membrane  
172 stained with CellMask was observed by fluorescence microscope through a band-pass filter  
173 (cut-on wavelength: 575 nm) under excitation ( $540 \pm 10$  nm). The cells without staining were  
174 also fixed with formalin, washed with PBS, incubated in ScaleA2, phosphoric acid (14.2 M),  
175 or PBS for 24 h, and observed under phase-contrast microscopy.

176

177 Measurement of optical loss of mouse tissues

178 Brain, liver, kidney, and lung samples were obtained from adult ICR mouse under anesthesia.  
179 The samples of liver, kidney, and lung were fixed by 4 wt% formaldehyde in PBS for 48 h,  
180 washed with PBS, and cut into approximately 3-mm-thick specimens. The fixed tissue  
181 specimens and brain hemispheres of mice were incubated in either of ScaleA2, PBS, or aqueous  
182 solution of indium chloride (4 M), sodium iodide (4 M), Triton X-100 (10 wt%), or phosphoric  
183 acid (8.5, 11.4, 14.2 M) for 60 min. The macroscopic images of the treated samples were  
184 captured by a digital camera. To confirm the reversibility of tissue clearing, 450- $\mu$ m-thick  
185 specimens of mouse brain were prepared, fixed by formaldehyde for 60 min, washed with PBS,  
186 incubated in 14.2 M phosphoric acid or PBS for 60 min, replaced and kept in PBS for 24 h, and  
187 their images were also recorded by digital camera.

188

189 **Results and Discussion**

190 Phospholipid containing both hydrophobic and hydrophilic parts is arranged in two layers on  
191 the plasma membrane; the hydrophobic part is on the interior of the membrane, whereas the  
192 hydrophilic part points outwards, toward either the cytoplasm or the fluid that surrounds the  
193 cell. The hydrophobic and hydrophilic parts have different refractive indices due to the  
194 difference in their dielectric constant. Our hypothesis was a possible contribution of decrease  
195 in polarization of the phosphate group, induced by electrostatic interaction of the polarized  
196 group with urea, to decrease the refractive index difference between the lipid bilayer and  
197 medium. The refractive index of the solution of a representative phospholipid  
198 dipalmitoylphosphatidylcholine (DPPC) in ethanol, which is able to dissolve both DPPC and  
199 urea, was higher than those of ethanol and water (Fig 1a). Adding urea to ethanol and DPPC  
200 solution in ethanol increased their refractive indices (Fig 1a). These results suggest that urea



201 does not decrease the refractive index of DPPC in ethanol but increases the refractive indices  
202 of the solutions. The light transparency of liposome suspended in aqueous solution of urea (4  
203 M), which shows higher refractive index than water, was higher than that of liposome  
204 suspended in water (Fig 1b). Moreover, 14.2 M phosphoric acid, which is an anionic molecule  
205 that does not interact with the anionic phosphate group of lipid bilayer, shows higher refractive  
206 index than 4 M urea solution and increased transparency of the liposome (Fig 1b). We  
207 concluded that urea increased the transparency of liposome not by affecting the polarization or  
208 refractive index of phosphate group of the lipid bilayer, but by reducing the difference in  
209 refractive indices between the medium and the lipid bilayer as well as phosphoric acid. The  
210 clearing effect of phosphoric acid is greater than that of 4 M urea due to higher refractive index.

211

212 Next, we investigated the clearing effect of phosphoric acid, which decreased the light loss of  
213 the liposomes, and other candidate chemical solutions on fixed cell suspensions of mouse brain  
214 tissues. We targeted phosphoric acid solution, because phosphate group composes of the  
215 strongly polarized part and thus contributes to high refractive index of the phospholipid bilayer.  
216 Tissue-clearing effects of many kinds of solvents were evaluated by measuring the light loss  
217 (OD<sub>600</sub>) of suspension of tissue cells fixed with formaldehyde after homogenization, as shown  
218 in previous studies [24]. The light loss of formalin-fixed cell suspensions of mouse brain was  
219 decreased by 24-h incubation in phosphoric acid and ScaleA2 (Fig 2). On the other hand,  
220 although 4 M sodium iodide (4 M) solution has a similar high refractive index to phosphoric  
221 acid, sodium iodide did not decrease the light loss of the cell suspension during the 24-h  
222 incubation. Indium chloride (4 M) also has a similar refractive index to urea (4 M), it did not  
223 attenuate the light loss by the 24-h incubation as well as sodium iodide. This lack of clearing  
224 effect of sodium iodide and indium chloride may be due to relatively poor infiltration of this  
225 molecule into fixed tissues or cells. Incubation of cultured cells in tissue clearing solutions

226 (phosphoric acid and *ScaleA2*) attenuated the bright signal on the boundary of cells in the  
227 phase-contrast image in a concentration-dependent manner (Fig 3). Because the bright signal  
228 on the cell boundary is generated where the difference in refractive index between the sample  
229 and background is large, the decrease in the signal by the clearing solutions confirms the effects  
230 of the solution on the refractive index difference between the cell membrane and medium. The  
231 stability of formalin-fixed cell membrane in phosphoric acid was confirmed by labeling the  
232 membrane of the cultured cells, suggesting that phosphoric acid does not damage the fixed  
233 membrane during incubation (Fig 4). Macroscopic images of formalin-fixed organ specimens  
234 (liver, kidney, and lung) of mice demonstrated that the samples were partially cleared by 60-  
235 min incubation in phosphoric acid solution (Fig 5). Phosphoric acid (8.5 M) is effective for  
236 reducing scattering by the liver, while higher concentrations of 11.4 M and 14.2 M are needed  
237 for the kidney and lung, respectively. On the other hand, 60-min incubation was too short to  
238 clear the tissue specimens by *ScaleA2*. Rapid tissue clearing by phosphoric acid is possibly due  
239 to fast infiltration of the molecule because of its small size. The molecular size (volume) of  
240 phosphoric acid ( $\text{PO}_4^{3-}$ ) is smaller than that of urea ( $\text{CH}_3\text{COCH}_3$ ), glycerol [ $\text{CH}_2(\text{OH})-$   
241  $\text{CH}(\text{OH})-\text{CH}_2(\text{OH})$ ], and sugars and sugar alcohols. Other candidate chemicals investigated in  
242 the present study, sodium iodide (4 M) and indium chloride (4 M), did not make the tissues  
243 transparent but induced shrinkage of samples, especially the kidney specimen. Phosphoric acid  
244 is also able to make brain hemisphere transparent as shown in Fig 6. The clearing by phosphoric  
245 acid is reversible; re-incubation of transparent 450- $\mu\text{m}$ -thick brain slices in PBS made the  
246 sample opaque as well as the original image before phosphoric-acid treatment (Fig 6b). This  
247 result indicates that phosphoric acid reduces light scattering in the tissue sample not by  
248 irreversible chemical modification but by adjusting the refractive index of the sample to a value  
249 close to that of the cell membrane by simple infiltration. Re-incubation of the sample in PBS  
250 removed phosphoric acid from the sample and made it opaque reversibly.

251

## 252 **Conclusions**

253 The present study showed that phosphoric acid, a hydrophilic solvent, can clear tissues  
254 including brain, liver, kidney, and lung of mice. Phosphoric acid reduces light scattering by  
255 mouse tissues rapidly as it requires only 60-min incubation, while it does not damage the  
256 morphology of cell membrane with phospholipid bilayer. The present study showed that  
257 phosphoric acid reduced scattering by mouse tissues but did not reduce the light loss due to  
258 absorption by the tissues. Combination use of decolorization reagent such as aminoalcohol [25]  
259 with small molecular solutes that increase refractive index, like phosphoric acid, may achieve  
260 better and rapid tissue clearing. The potential of phosphoric salts with neutral pH for tissue  
261 clearing is also of future interest because acidic condition generally denatures fluorescent  
262 proteins [32, 33]. The rapid reducing of scattering with the use of phosphoric acid as presented  
263 here will contribute to develop better and faster soaking methods for tissue clearing that  
264 previously reported protocols.

265

## 266 **Financial Disclosure**

267 This work was partially supported by the MEXT Grant-in-Aid for Scientific Research on  
268 Innovative Areas (Resonance Bio), no. 15H05950, and the MEXT-Supported Program for the  
269 Strategic Research Foundation at Private Universities, no. S1511012. The funders had no role  
270 in study design, data collection and analysis, decision to publish, or preparation of the  
271 manuscript.

272

## 273 **Competing Interests**

274 There are no conflicts of interest to declare.

275

276 **References**

- 277 [1] Denk W, Horstmann H. Serial block-face scanning electron microscopy to reconstruct three-  
278 dimensional tissue nanostructure, PLoS Biol. 2004;2: e329.
- 279 [2] Micheva KD, Smith SJ. Array tomography: a new tool for imaging the molecular  
280 architecture and ultrastructure of neural circuits. Neuron. 2007;55: 25-36.
- 281 [3] Helmstaedter M, Briggman KL, Denk W. 3D structural imaging of the brain with photons  
282 and electrons. Curr Opin Neurobiol. 2008;18: 633-641.
- 283 [4] Boas D. A fundamental limitation of linearized algorithms for diffuse optical tomography.  
284 Opt Express. 1997;1: 404-413.
- 285 [5] Genina EA, Bashkatov AN, Tuchin VV. Tissue optical immersion clearing. Expert Rev Med  
286 Devic. 2010;7: 825-842.
- 287 [6] Richardson DS, Lichtman JW. Clarifying Tissue Clearing. Cell 2015;162: 246-257.
- 288 [7] Dodt HU, Leischner U, Schierloh A, Jährling N, Mauch CP, Deininger K, et al.  
289 Ultramicroscopy: three-dimensional visualization of neuronal networks in the whole mouse  
290 brain. Nat Methods. 2007;4: 331-336.
- 291 [8] Becker K, Jährling N, Saghafi S, Weiler R, Dodt HU. Chemical clearing and dehydration  
292 of GFP expressing mouse brains. PLoS One. 2012;7: e33916.
- 293 [9] Ertürk A, Mauch CP, Hellal F, Förstner F, Keck T, Becker K, et al. Three-dimensional  
294 imaging of the unsectioned adult spinal cord to assess axon regeneration and glial responses  
295 after injury. Nat Med. 2012b;18: 166-171.
- 296 [10] Ertürk A, Becker K, Jährling N, Mauch CP, Hojer CD, Egen JG, et al., Three-dimensional  
297 imaging of solvent-cleared organs using 3DISCO. Nat Protoc. 2012a;7: 1983-1995.
- 298 [11] Renier N, Wu Z, Simon DJ, Yang J, Ariel P, Tessier-Lavigne M. iDISCO: a simple, rapid  
299 method to immunolabel large tissue samples for volume imaging. Cell. 2014;159: 896-910.
- 300 [12] Hama H, Kurokawa H, Kawano H, Ando R, Shimogori T, Noda H, et al. Scale: a chemical

- 301 approach for fluorescence imaging and reconstruction of transparent mouse brain. *Nat*  
302 *Neurosci.* 2011;14: 1481-1488.
- 303 [13] Kuwajima T, Sitko AA, Bhansali P, Jurgens C, Guido W, Mason C. ClearT: a detergent-  
304 and solvent-free clearing method for neuronal and non-neuronal tissue. *Development.*  
305 2013;140: 1364-1368.
- 306 [14] Ke MT, Fujimoto S, Imai T. SeeDB: a simple and morphology-preserving optical clearing  
307 agent for neuronal circuit reconstruction. *Nat Neurosci.* 2013;16: 1154-1161.
- 308 [15] Hou B, Zhang D, Zhao S, Wei M, Yang Z, Wang S, et al. Scalable and DiI-compatible  
309 optical clearance of the mammalian brain. *Front Neuroanat.* 2015;9: 19.
- 310 [16] Yu T, Qi Y, Wang J, Feng W, Xu J, Zhu J. Rapid and prodium iodide-compatible optical  
311 clearing method for brain tissue based on sugar/sugar-alcohol. *J Biomed Opt.* 2016;21:  
312 081203.
- 313 [17] Ke MT, Nakai Y, Fujimoto S, Takayama R, Yoshida S, Kitajima TS, et al. Super-  
314 Resolution Mapping of Neuronal Circuitry With an Index-Optimized Clearing Agent. *Cell*  
315 *Rep.* 2016;14: 2718-2732.
- 316 [18] Chung K, Wallace J, Kim SY, Kalyanasundaram S, Andalman AS, Davidson TJ, et al.  
317 Structural and molecular interrogation of intact biological systems. *Nature.* 2013;497: 332-  
318 337.
- 319 [19] Tomer R, Ye L, Hsueh B, Deisseroth K. Advanced CLARITY for rapid and high-resolution  
320 imaging of intact tissues. *Nat Protocol.* 9: 2014;1682-1697.
- 321 [20] Zheng H, Rinaman L. Simplified CLARITY for visualizing immunofluorescence labeling  
322 in the developing rat brain. *Brain Struct Funct.* 2016;221: 2375-2383.
- 323 [21] Aoyagi Y, Kawakami R, Osanai H, Hibi T, Nemoto T. A rapid optical clearing protocol  
324 using 2,2'-thiodiethanol for microscopic observation of fixed mouse brain. *PLoS One.*  
325 2015;10: e0116280.

- 326 [22] Costantini I, Ghobril JP, Di Giovanna AP, Allegra Mascaro AL, Silvestri L, Müllenbroich  
327 MC, et al. A versatile clearing agent for multi-modal brain imaging. *Sci Rep.* 2015;5: 9808.
- 328 [23] Lee E, Choi J, Jo Y, Kim JY, Jang YJ, Lee HM, et al. ACT-PRESTO: Rapid and consistent  
329 tissue clearing and labeling method for 3-dimensional (3D) imaging. *Sci Rep* 2016;6: 18631.
- 330 [24] Susaki EA, Tainaka K, Perrin D, Kishino F, Tawara T, Watanabe TM. Whole-brain  
331 imaging with single-cell resolution using chemical cocktails and computational analysis.  
332 *Cell.* 2014;157: 726-739.
- 333 [25] Tainaka K, Kubota SI, Suyama TQ, Susaki EA, Perrin D, Ukai-Tadenuma M. Whole-body  
334 imaging with single-cell resolution by tissue decolorization. *Cell.* 2014;159: 911-924.
- 335 [26] Kubota SI, Takahashi K, Nishida J, Morishita Y, Ehata S, Tainaka K, et al. Whole-Body  
336 Profiling of Cancer Metastasis with Single-Cell Resolution. *Cell Rep.* 2017;20: 236-250.
- 337 [27] Matryba P, Bozycki L, Pawłowska M, Kaczmarek L, Stefaniuk M. Optimized perfusion-  
338 based CUBIC protocol for the efficient whole-body clearing and imaging of rat organs. *J*  
339 *Biophotonics.* 2018;11: e201700248.
- 340 [28] Hama H, Hioki H, Namiki K, Hoshida T, Kurokawa H, Ishidate F, et al. ScaleS: an optical  
341 clearing palette for biological imaging. *Nat Neurosci.* 2015;18: 1518-1529.
- 342 [29] Tainaka K, Murakami TC, Susaki EA, Shimizu C, Saito R, Takahashi K. Chemical  
343 Landscape for Tissue Clearing Based on Hydrophilic Reagents. *Cell Rep.* 2018;24: 2196-  
344 2210.
- 345 [30] Susaki EA, Ueda HR. Whole-body and whole-organ clearing and imaging techniques with  
346 single-cell resolution: Toward organism-level systems biology in mammals. *Cell Chem Biol.*  
347 2016;23: 137-157.
- 348 [31] Bangham A. Properties and uses of lipid vesicles: an overview. *Ann N Y Acad Sci.*  
349 1978;308: 2-7.
- 350 [32] Enoki S, Saeki K, Maki K, Kuwajima K. Acid denaturation and refolding of green

351 fluorescent protein. *Biochemistry*. 2004;43: 14238-14248.

352 [33] Schwarz MK, Scherbarth A, Sprengel R, Engelhardt J, Theer P, Giese G. Fluorescent-

353 protein stabilization and high-resolution imaging of cleared, intact mouse brains. *PLoS One*.

354 2015;10: e0124650.

355

### 356 **Supporting Information**

357 The data required to reproduce the optical loss of suspensions of liposome and brain cells in

358 each solvent are posted as a supporting information.

359

360 Figure Captions

361

362 **Fig 1. Effects of urea and phosphoric acid on the refractive indices of solvents and on**  
363 **transparency of liposome suspension.** Refractive indices of DPPC in ethanol and its mixture  
364 with urea are shown in (a). An increase in the refractive index of DPPC solution in ethanol by  
365 urea suggests that urea does not influence the polarization of the phosphoric acid group of lipid  
366 bilayer but increases the refractive index of the medium. The effects of urea (4 M) and  
367 phosphoric acid (14.2 M) on the refractive index of the medium and transparency of liposome,  
368 determined by OD600, are shown in (b). The data of transmittance (%) are shown as mean  $\pm$ SD  
369 (n = 3). Abbreviation: DPPC, 1,2-dipalmitoyl-sn-glycero-3-phosphocholine.

370

371 **Fig 2. Effects of candidate solutions with different refractive indices on light loss for fixed**  
372 **cell suspension.** Effects of 24-h incubation in candidate chemical solutions with various  
373 refractive indices on OD600 values (mean  $\pm$ SD, n = 3) of brain cell suspension fixed with  
374 formaldehyde are shown. Phosphoric acid (8.5, 11.4, 14.2 M) further increases the refractive  
375 indices of medium and transparency of the cell suspension than sodium iodide (4 M), urea (4  
376 M), and indium chloride (4 M). Abbreviations: InCl, indium chloride; NaI, sodium iodide.

377

378 **Fig 3. Phase-contrast images of formalin-fixed cultured Colon-26 cells incubated in**  
379 **phosphoric acid or ScaleA2.** Effect of ScaleA2 and phosphoric acid (14.2 M) solution on the  
380 phase contrast on the edge of cultured cells is shown in the microscopic images. Scale bars  
381 indicate 50  $\mu$ m. The graph shows the concentration-dependent effect of phosphoric acid  
382 (8.5–14.2 M) on the gray values of background and the edge in the microscopic images.

383

384



385 **Fig 4. Images of formalin-fixed plasma membrane of cultured cells incubated in**  
386 **phosphoric acid.** Cultured Colon-26 cells were stained with CellMask Orange (Thermo Fisher  
387 Scientific), fixed by 4 wt% formaldehyde in PBS, washed with PBS, and then incubated in  
388 phosphoric acid (14.2 M) for 0–48 h and observed under microscope. Scale bars indicate 10  
389  $\mu\text{m}$ . The images confirmed that formalin-fixed cell membrane was retained during incubation  
390 in the solution.

391

392 **Fig 5. Effect of incubation in chemical solutions on macroscopic images of formalin-fixed**  
393 **tissue specimens of mice.** The organ specimens of murine (a) liver, (b) kidney, and (c) lung  
394 were fixed with 4 wt% formaldehyde for 48 h, washed with PBS, and then incubated in  
395 indicated chemical solutions for 60 min. The apertures of the background lattice are 4 mm.

396

397 **Fig 6. Clearing mouse brains by phosphoric acid.** Representative images of (a) hemispheres  
398 and (b) 450- $\mu\text{m}$ -thick specimens of mouse brains before and after 60-min incubation in  
399 phosphoric acid (8.5, 11.4, and 14.2 M) are shown. As shown in (b), the brain tissue that were  
400 cleared once by phosphoric acid (14.2 M) returned to opaque state by re-incubation in PBS for  
401 24 h.

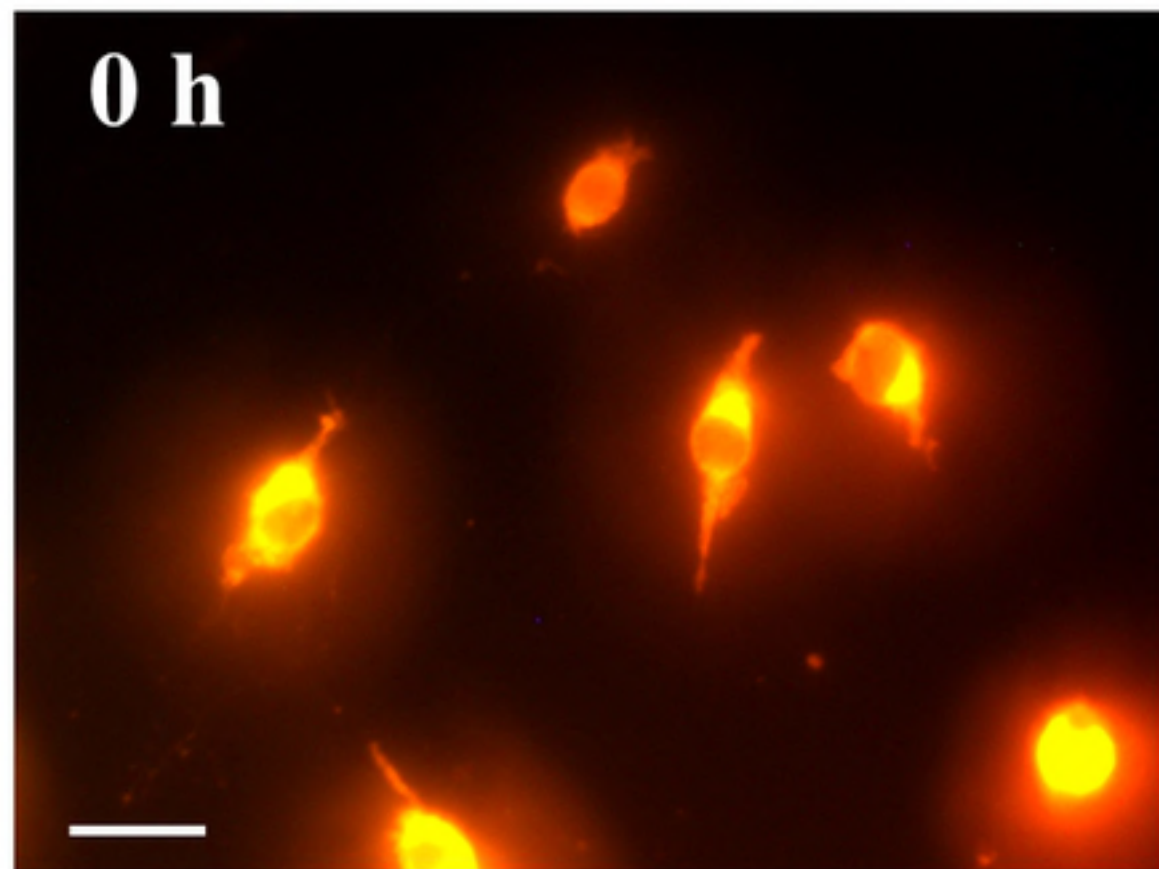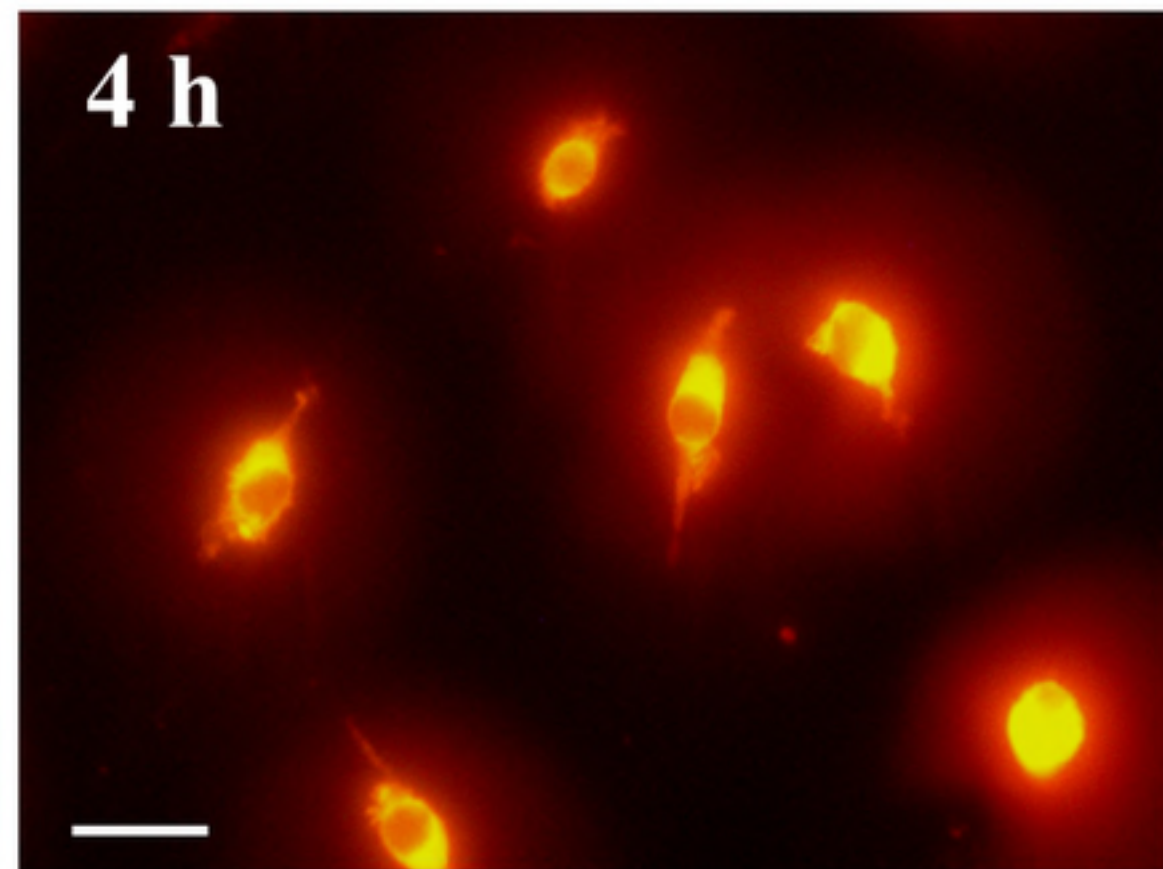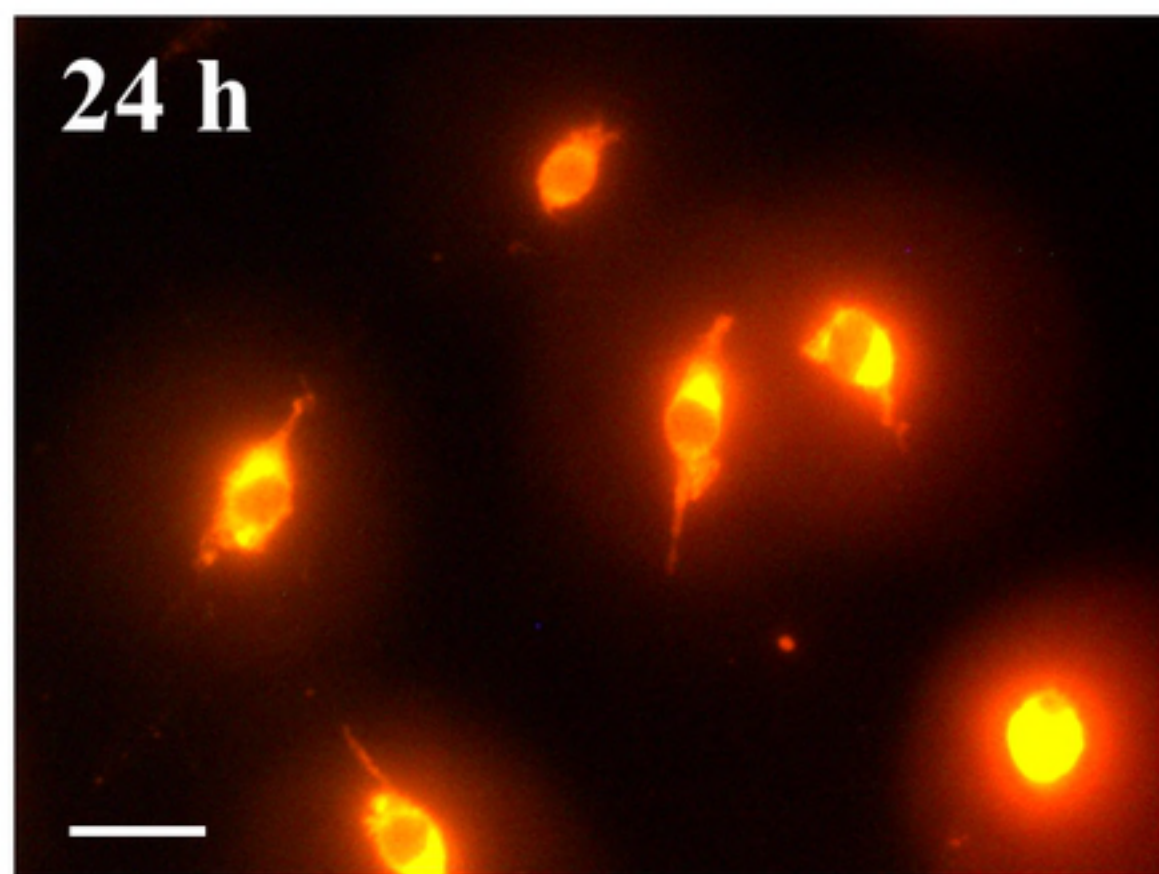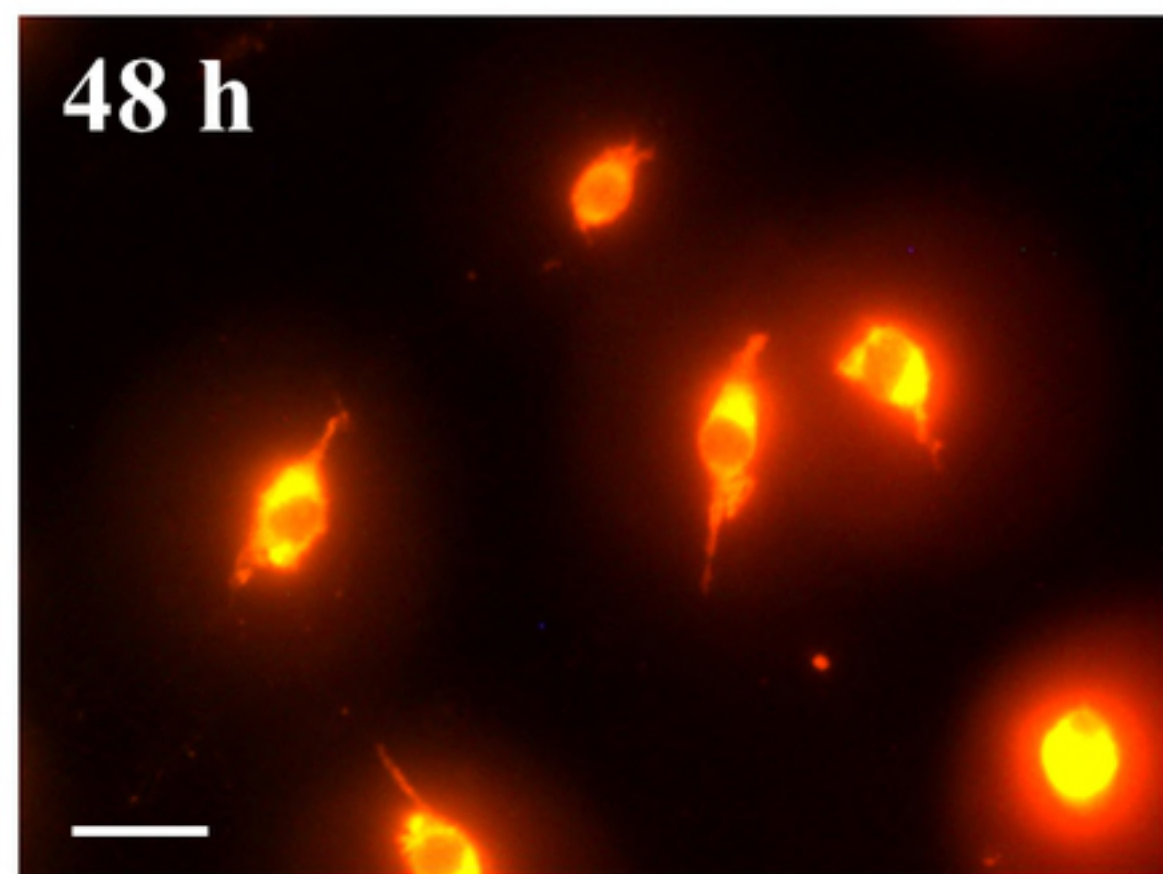

Fig. 4



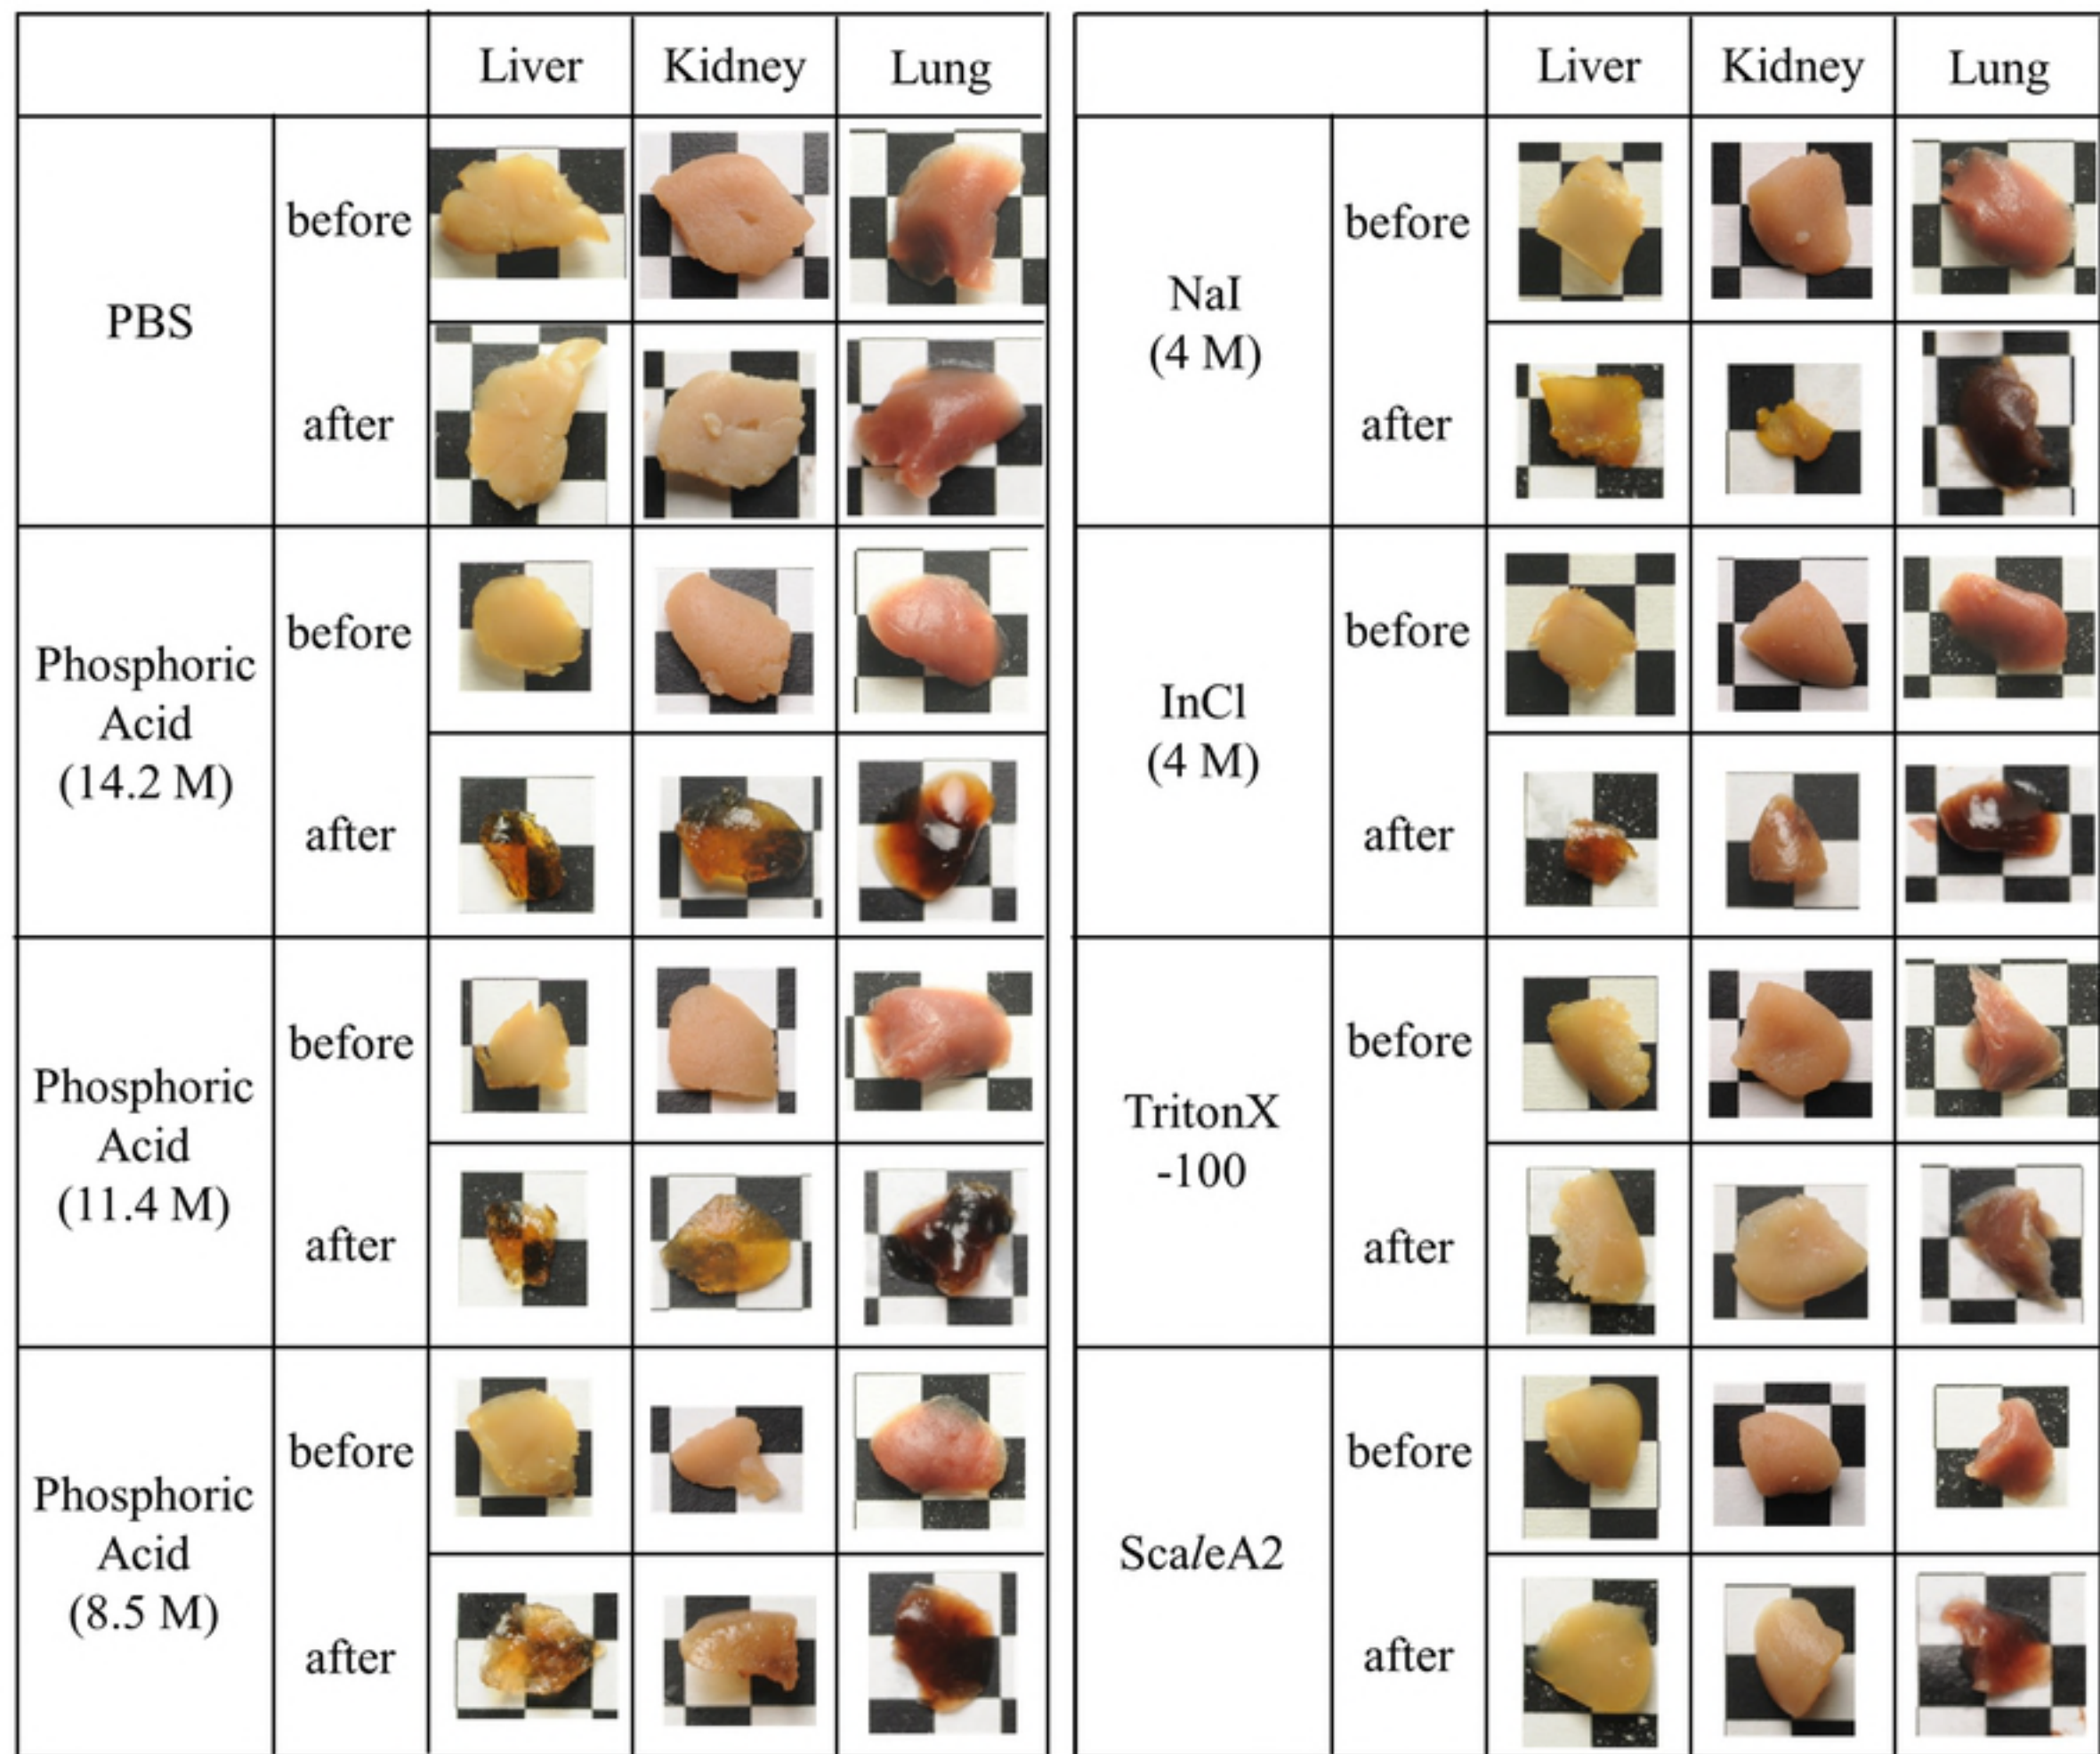

Fig. 5

(a)

Before Incubation

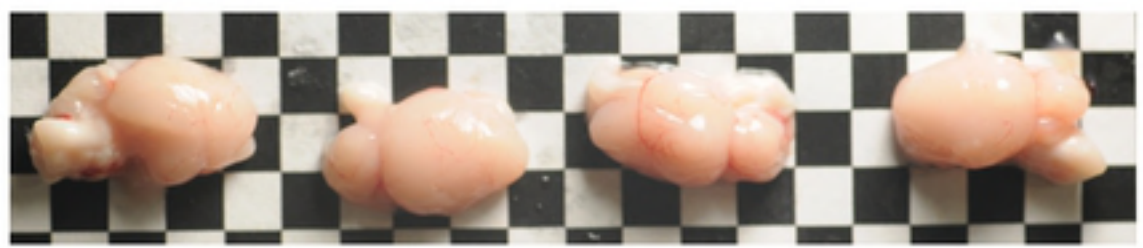

After Incubation

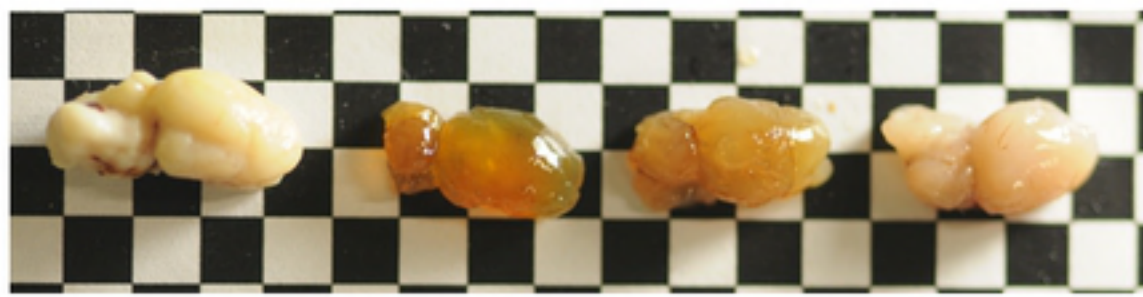

PBS

14.2 M

11.4 M

8.5 M

Phosphoric Acid

(b)

Before Incubation

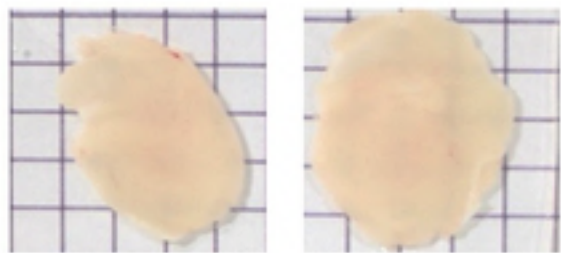

After Incubation

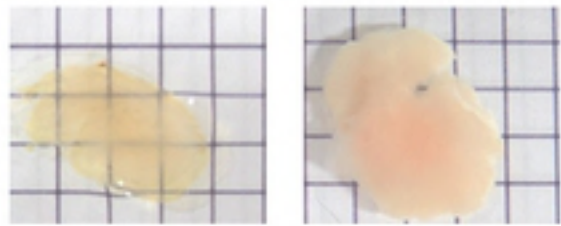

Re-Incubation in PBS

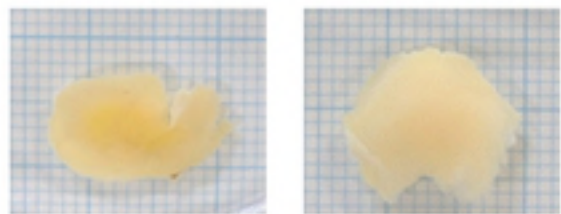

Phosphoric Acid (14.2 M)

PBS

Fig. 6



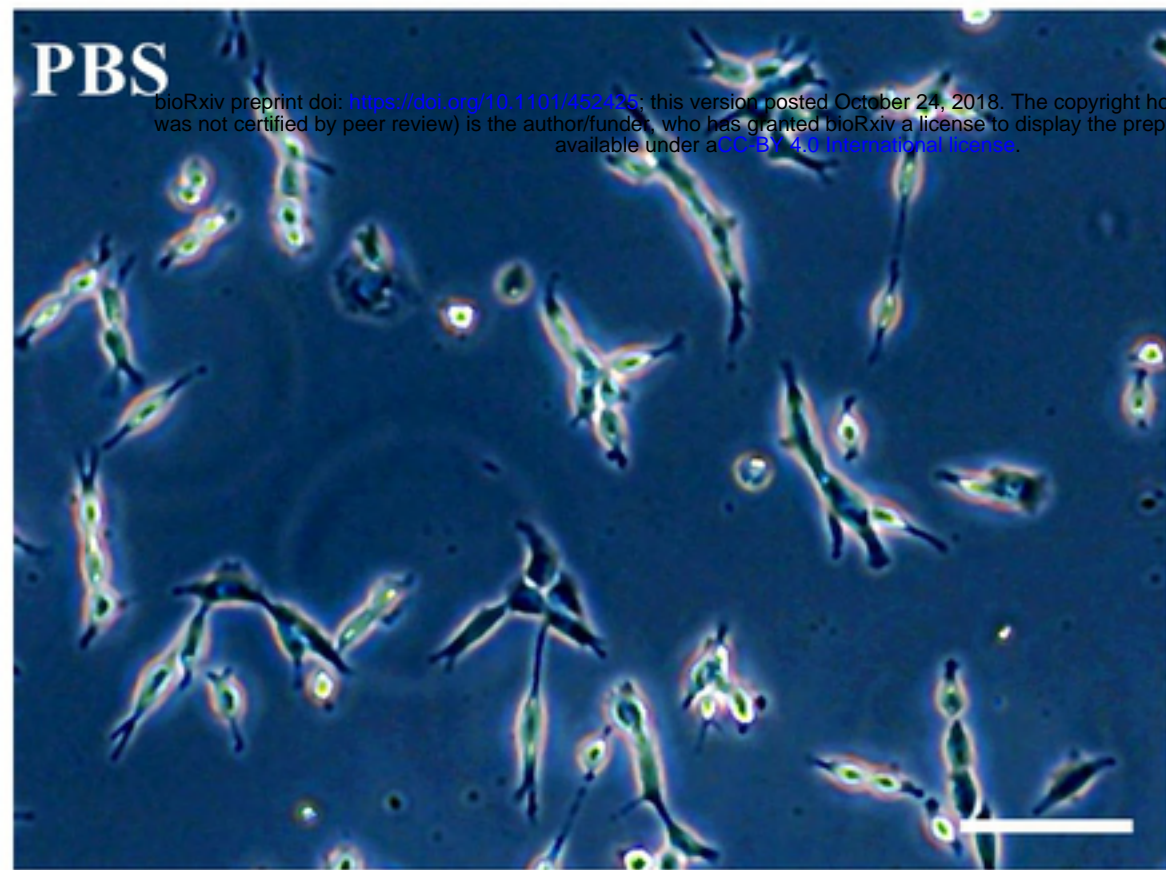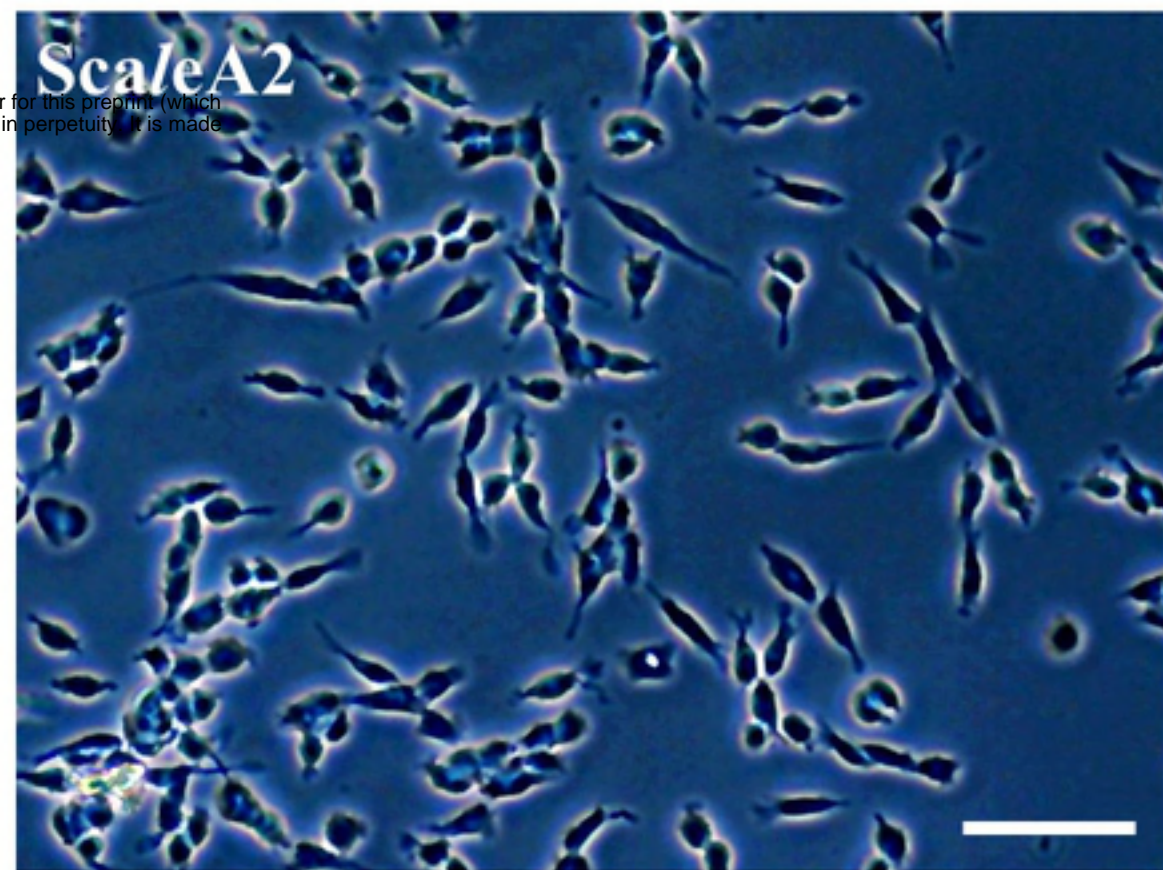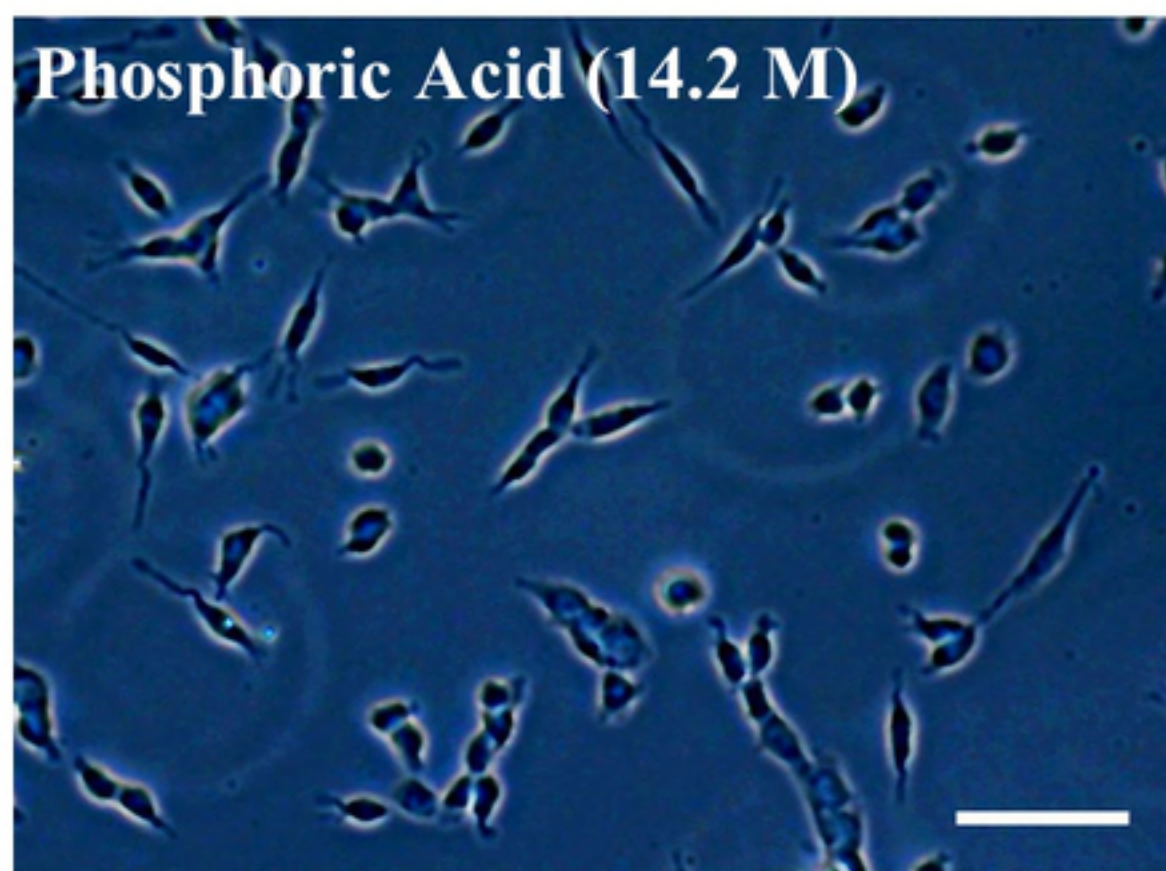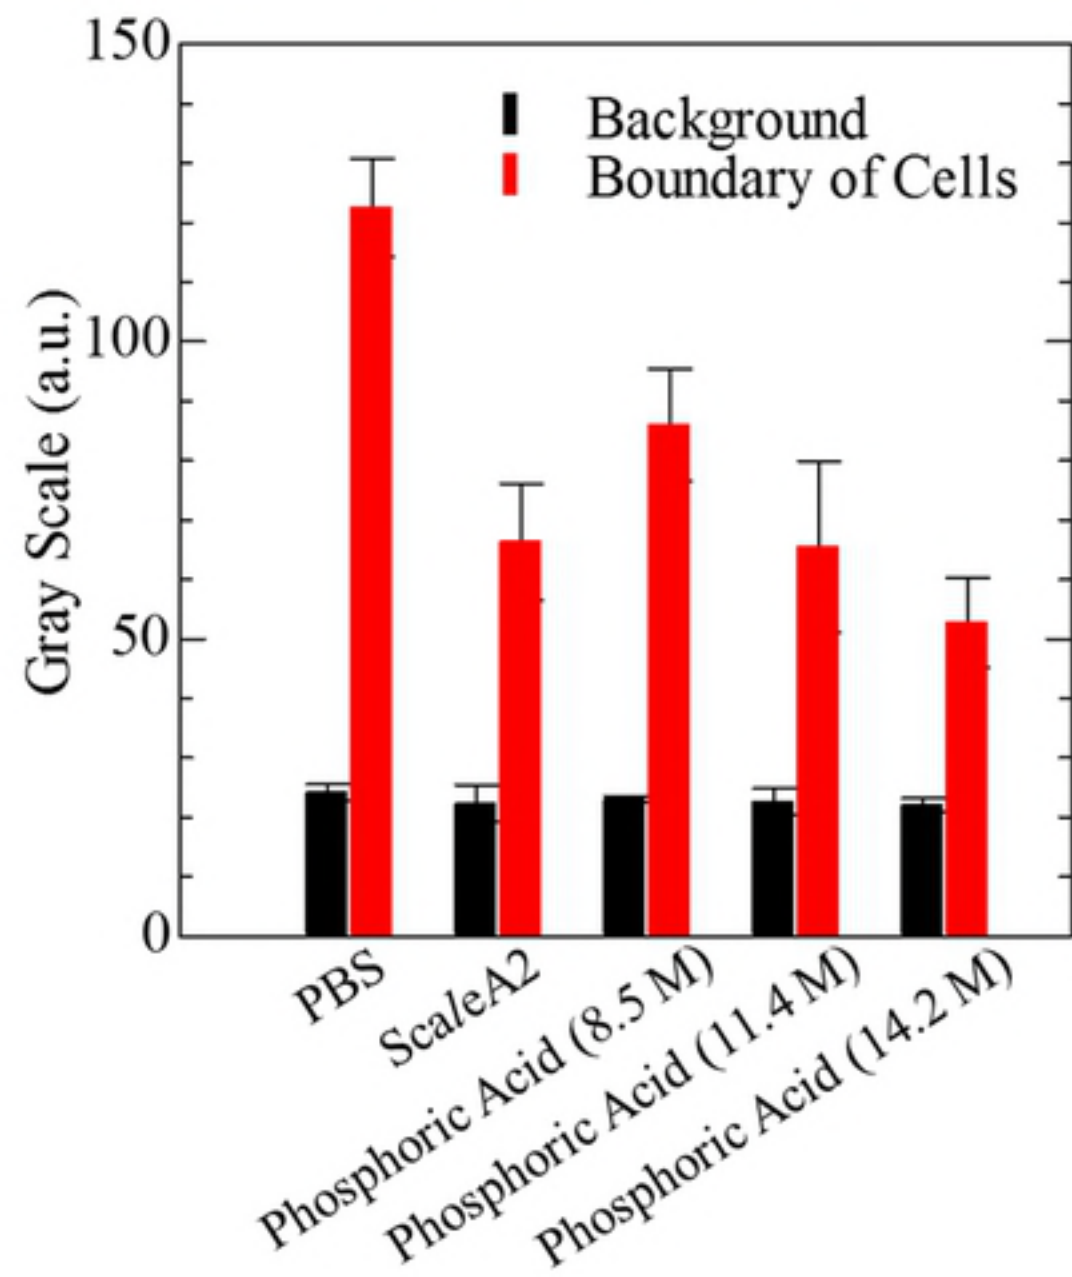

Fig. 3

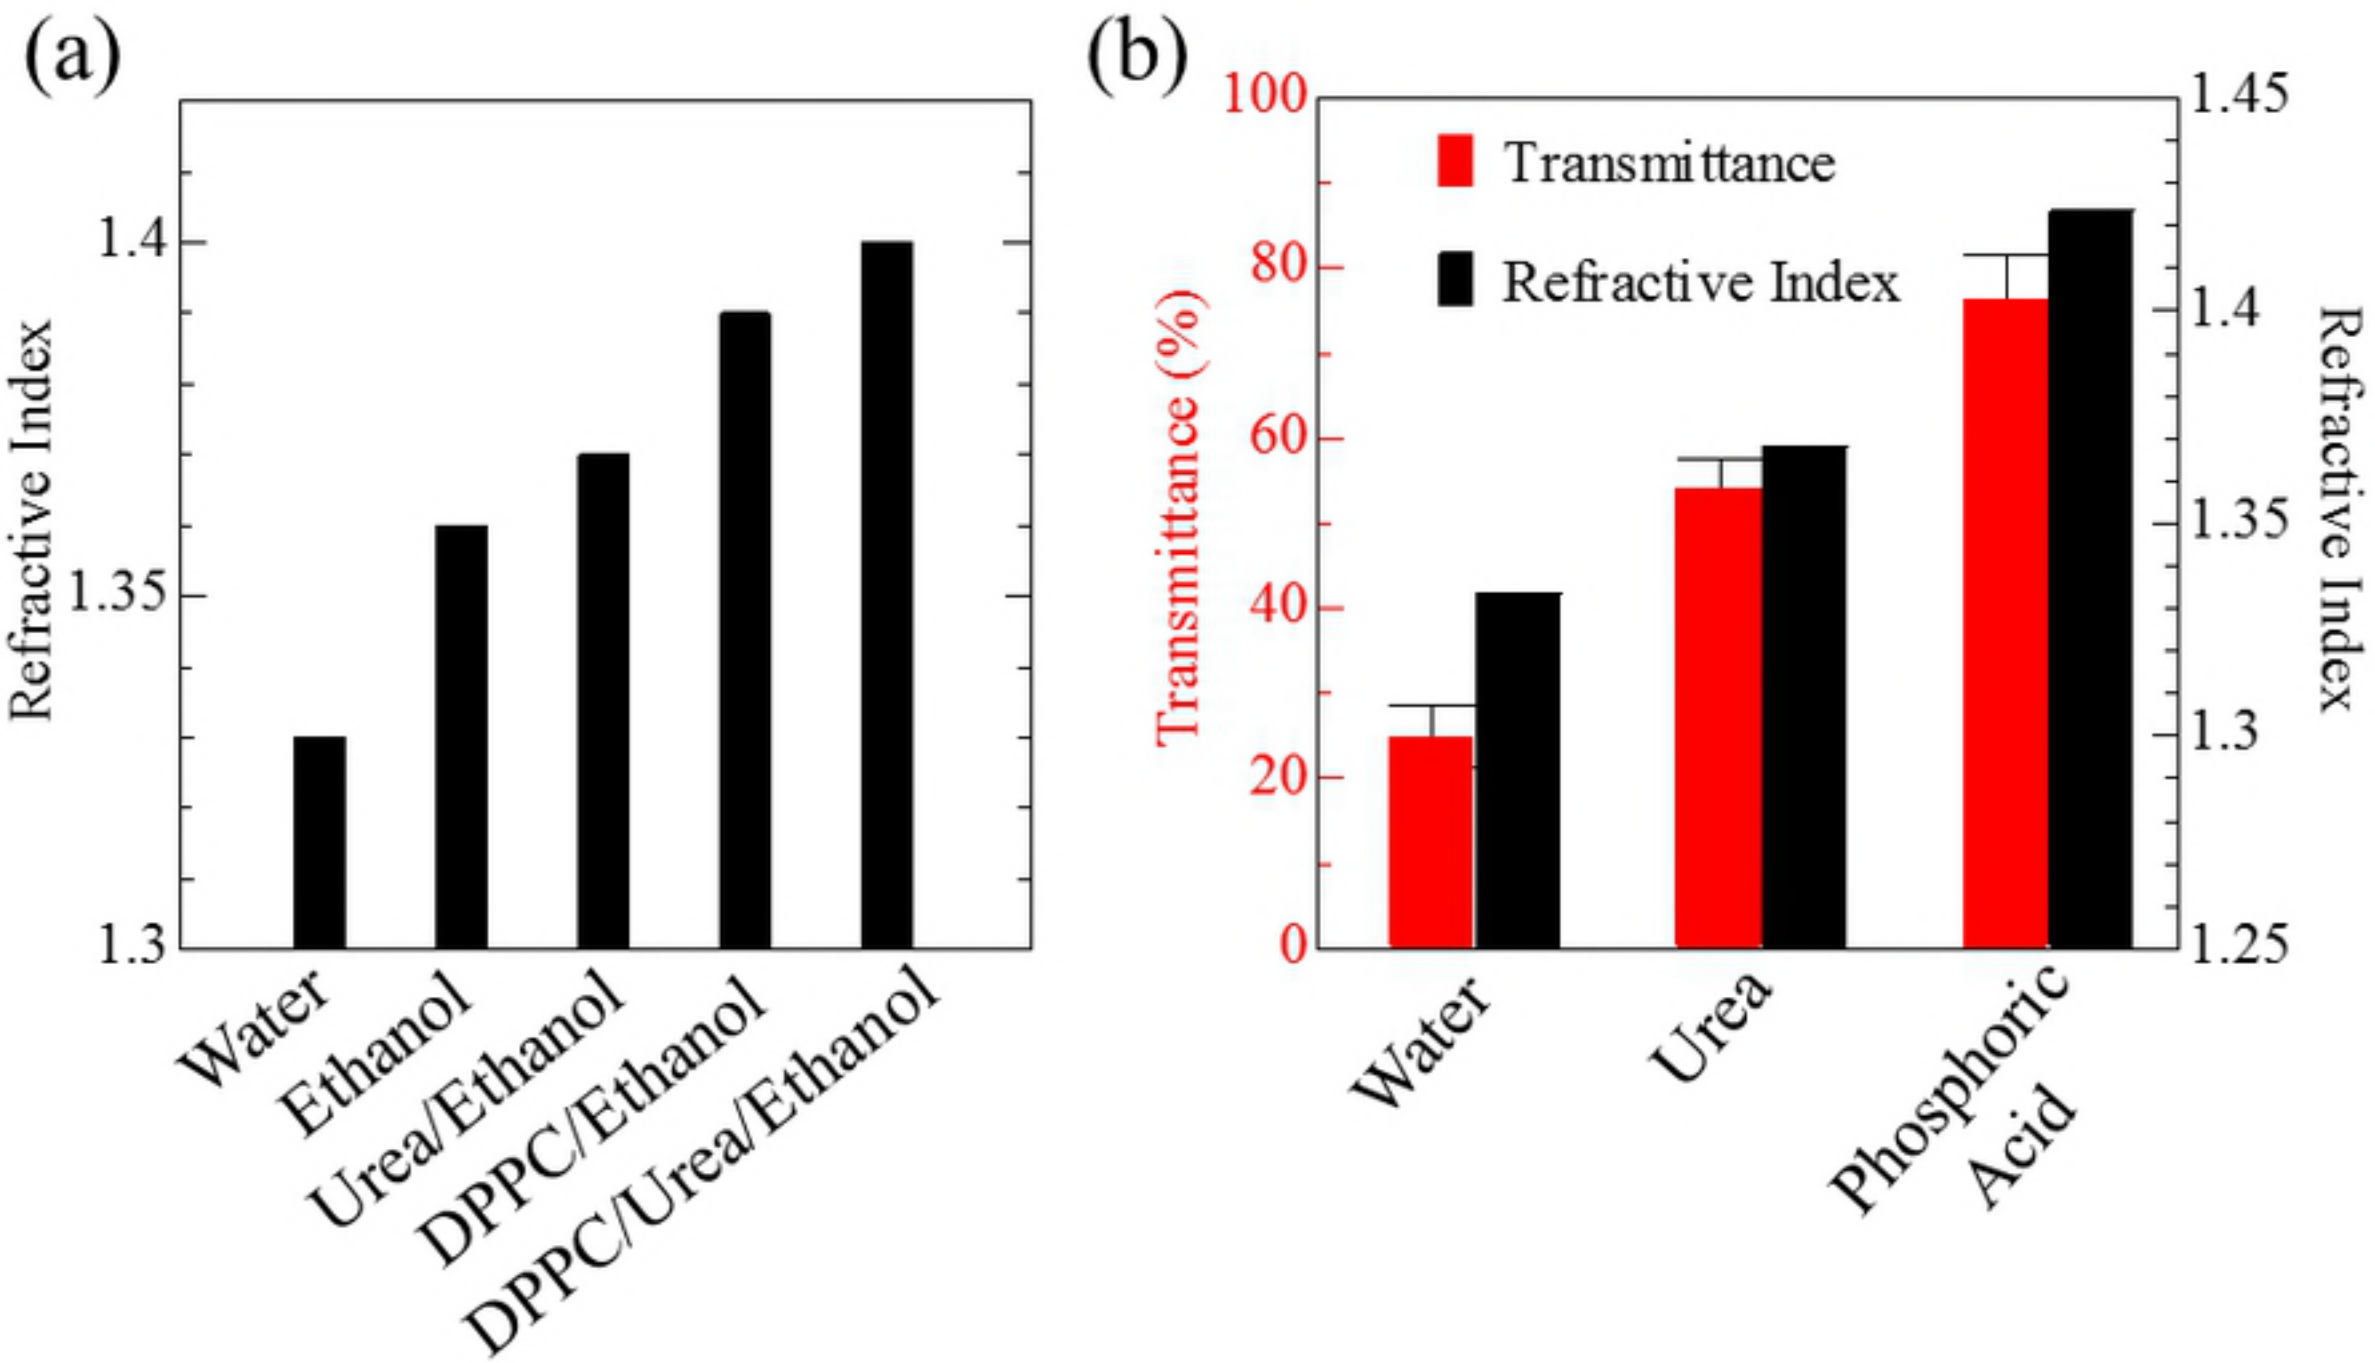

Fig. 1



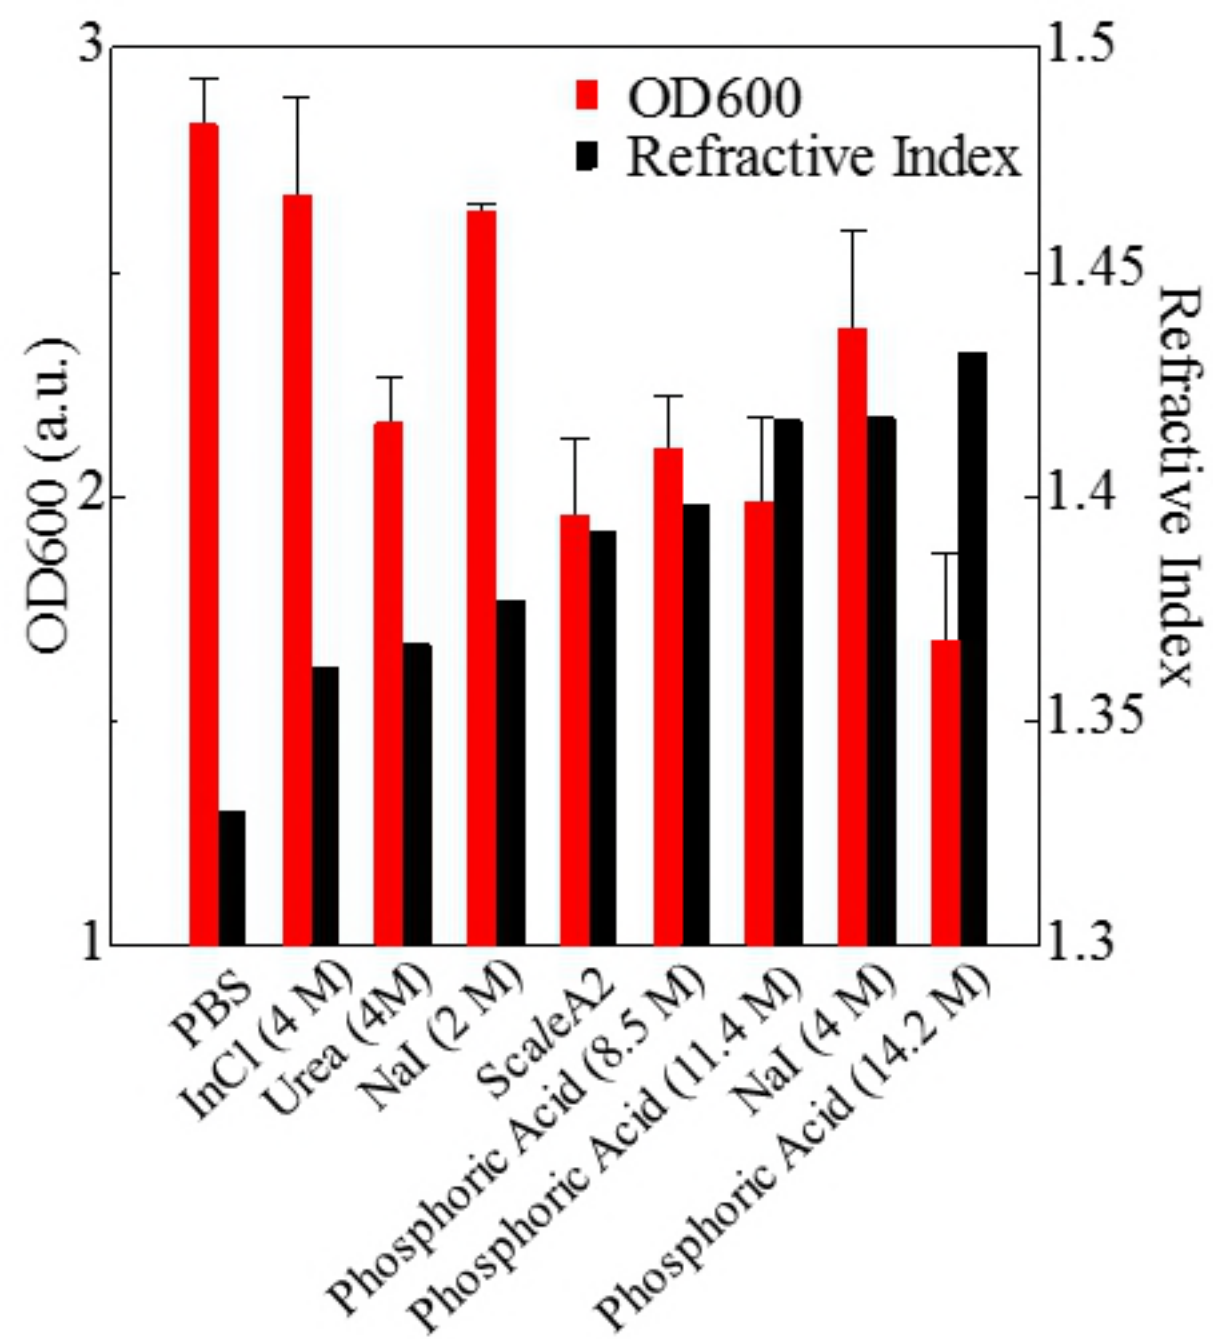

Fig. 2
